# Supplementary material for: A Sensitive FRET Biosensor Based on Carbon Dots-Modified Nanoporous Membrane for 8-hydroxy-2′-Deoxyguanosine (8-OHdG) Detection with Au@ZIF-8 Nanoparticles as Signal Quenchers
Source: Nanomaterials (Basel). 2020 Oct 16;10(10):2044. doi: 10.3390/nano10102044 (PMC7602734; doi:10.3390/nano10102044)
Supplement: Supplementary file 1 [file nanomaterials-10-02044-s001.pdf]

**A sensitive FRET biosensor based on carbon dots modified nanoporous  
membrane for 8-hydroxy-2'-deoxyguanosine (8-OHdG) detection with Au@ZIF-  
8 nanoparticles as signal quenchers**

**Weiwei Ye <sup>1,2,\*</sup>, Yu Zhang <sup>3</sup>, Wei Hu <sup>3</sup>, Liwen Wang <sup>3</sup>, Yu Zhang <sup>4</sup>, Kejing Ying <sup>5</sup> and Ping Wang <sup>6</sup>**

<sup>1</sup> Key Laboratory of E&M, MOE, Zhejiang University of Technology, Hangzhou 310023, China;

<sup>2</sup> College of Mechanical Engineering, Zhejiang University of Technology, Hangzhou 310023, China;

<sup>3</sup> Department of Food Science and Technology, Zhejiang University of Technology, Hangzhou 310014, China; zhangyuzjut@163.com (Y.Z.); weihu1995@163.com (W.H.); Wlw4712@163.com (L.W.);

<sup>4</sup> Mechanical and Automotive Engineering, School of Engineering, RMIT University, Melbourne, Victoria 3004, Australia; fiona.zhang@rmit.edu.au

<sup>5</sup> Department of Respiratory Medicine, Sir Run Run Shaw Hospital, Zhejiang University, Hangzhou 310016, China; warsky.com@126.com

<sup>6</sup> Biosensor National Special Laboratory, Key Laboratory for Biomedical Engineering of Education Ministry, Department of Biomedical Engineering, Zhejiang University, Hangzhou, 310027, China; cnpwang@zju.edu.cn

\* Correspondence: yeweiwei@zjut.edu.com.

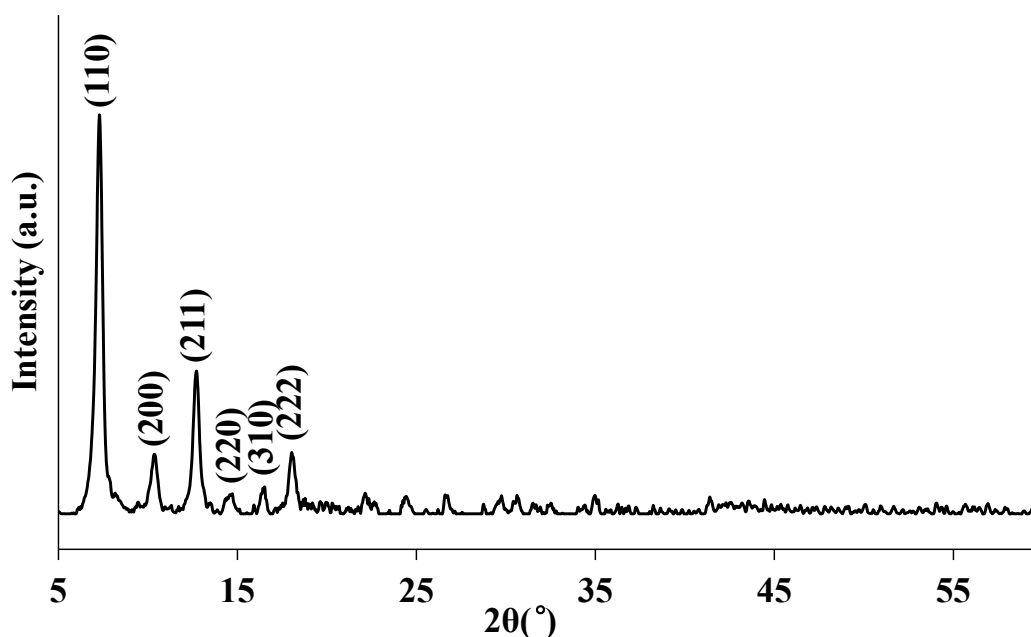

**Figure S1.** XRD pattern of Au@ZIF-8 nanoparticles.

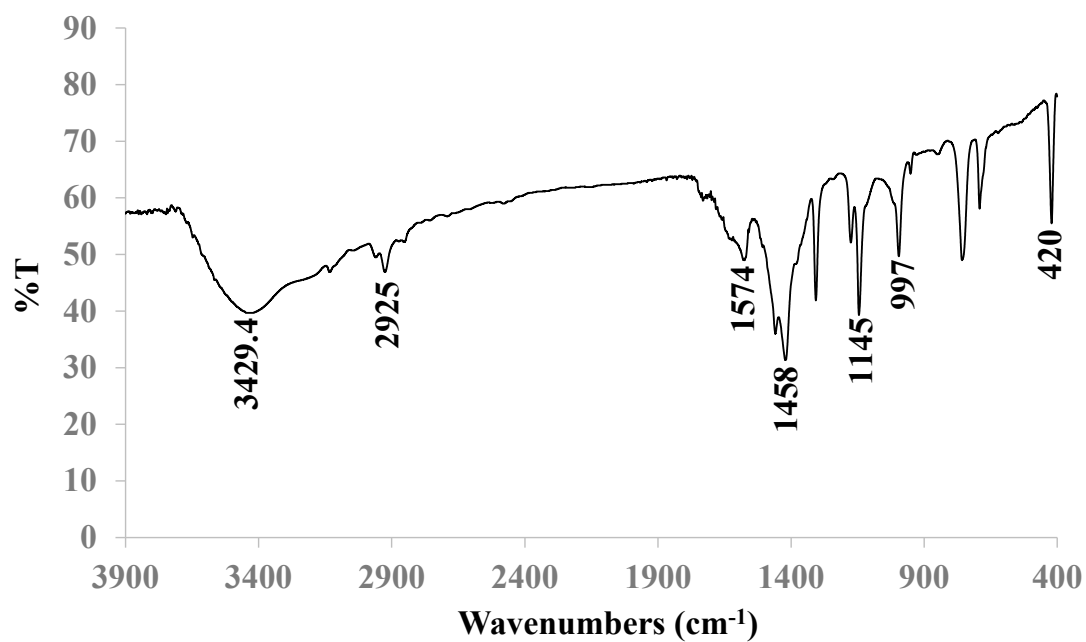

**Figure S2.** FTIR spectrum of Au@ZIF-8 nanoparticles.

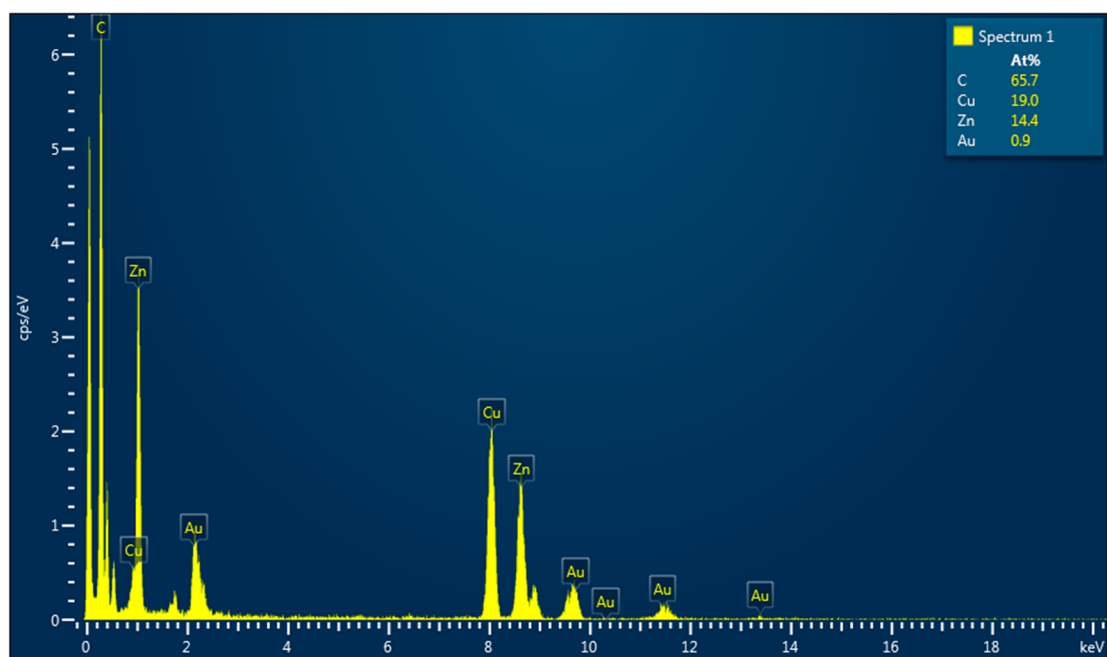

**Figure S3.** Energy dispersive X-ray spectroscopy (EDX) result for the CDs modified nanoporous alumina membranes with 8-OHdG capture and Au@ZIF-8 nanoparticles attachment.

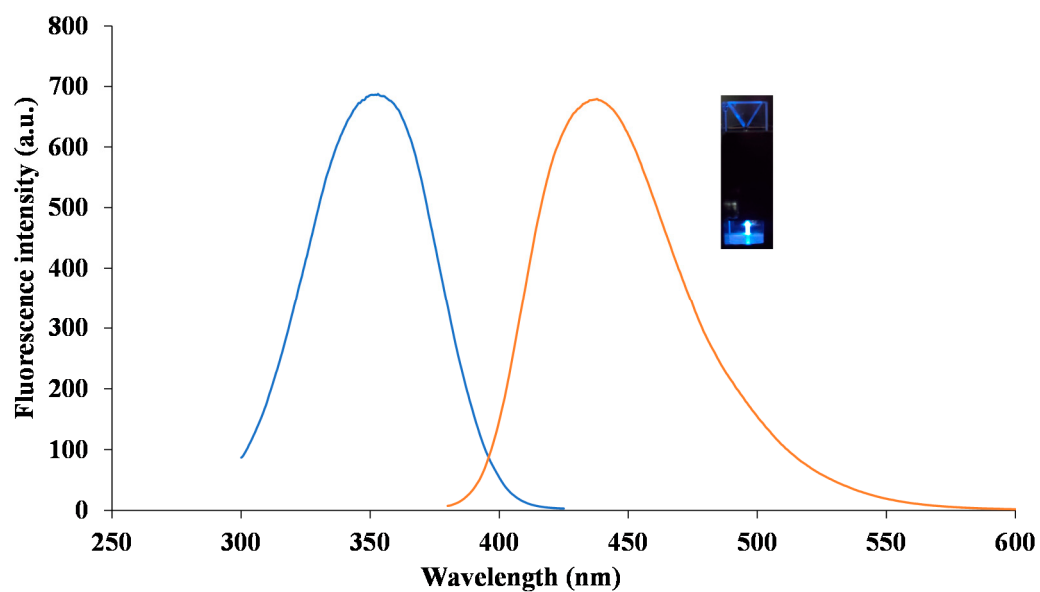

**Figure S4.** The excitation spectrum and emission spectrum of CDs. Inset: photoluminescence of CDs in solution.

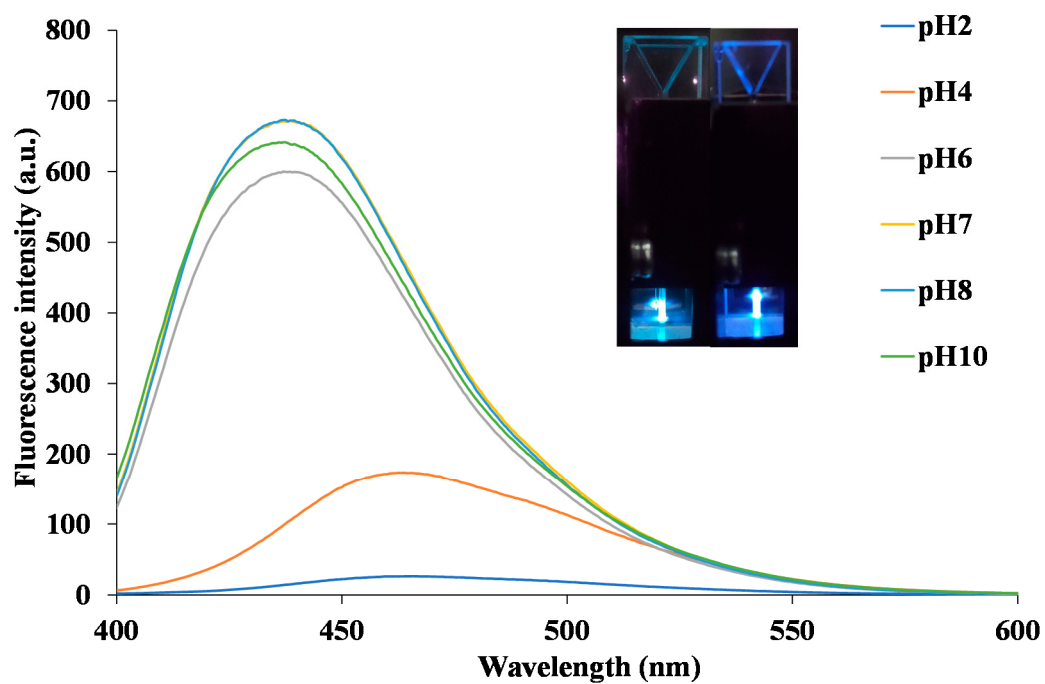

**Figure S5.** Photoluminescence spectra of CDs with pH 2 increased to pH 10. Inset: photoluminescence of CDs with pH 7 (right) and pH 8 (left).

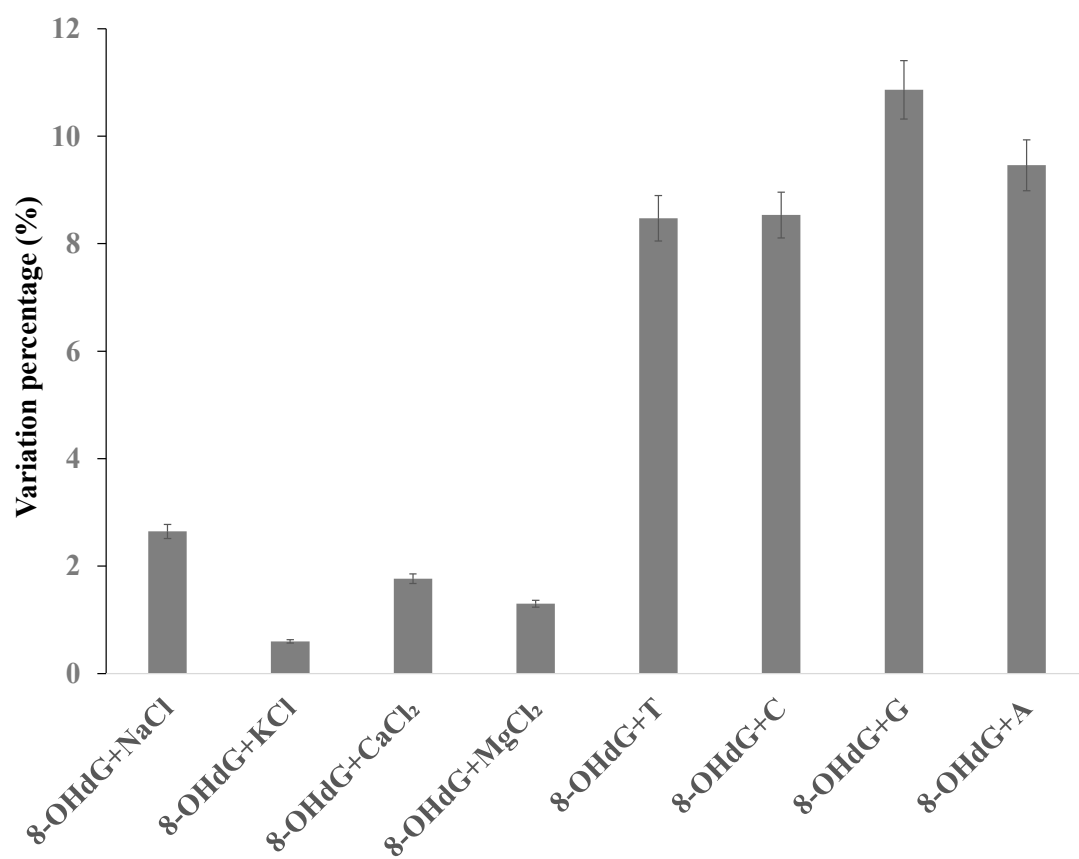

**Figure S6.** The variations of NaCl, KCl, CaCl<sub>2</sub>, MgCl<sub>2</sub>, thymine, cytosine, guanine, and adenine interference.
